# Supplementary material for: Single-nuclei RNA-seq reveals skin cell responses to Aeromonas hydrophila infection in Chinese longsnout catfish Leiocassis longirostris
Source: Front Immunol. 2023 Oct 16;14:1271466. doi: 10.3389/fimmu.2023.1271466 (PMC10613986; doi:10.3389/fimmu.2023.1271466)
Supplement: Supplementary file 9 [file Table_4.xlsx]

## Sheet: Sheet1
Table S4. Cell numbers of 33 cluster in skin between control group and A. hydrophila infection group.
Cluster	cell name	C	A. hydrophila
Total		10400 (100%)	9181 (100%)
0	Type 1 keratinocyte	1402 (13.48%)	2765 (30.12%)
1	Type 2 keratinocyte	644 (6.19%)	1548 (16.86%)
2	T cells	723 (6.95%)	630 (6.86%)
3	Type 5 keratinocyte	211 (2.03%)	866 (9.43%)
4	Pericyte	904 (8.69%)	155 (1.69%)
5	Type 4 keratinocyte	558 (5.37%)	490 (5.34%)
6	Macrophage/Monocyte	664 (6.38%)	265 (2.89%)
7	Type 1 Fibroblast	571 (5.49%)	313 (3.41%)
8	Type 3 Fibroblast	506 (4.87%)	162 (1.76%)
9	Type 3 keratinocyte	332 (3.19%)	162 (1.76%)
10	Dendritic cell	406 (3.9%)	48 (0.52%)
11	Secretory cell	359 (3.45%)	89 (0.97%)
12	Myeloid cell	371 (3.57%)	66 (0.72%)
13	Type 8 keratinocyte	313 (3.01%)	125 (1.36%)
14	Type 1 Endothelial cells	257 (2.47%)	153 (1.67%)
15	Type 4 Fibroblast	239 (2.3%)	118 (1.29%)
16	B cell	194 (1.87%)	141 (1.54%)
17	Type 2 Endothelial cells	246 (2.37%)	59 (0.64%)
18	Neutrophils	90 (0.87%)	205 (2.23%)
19	Smooth muscle cells	177 (1.7%)	109 (1.19%)
20	Smooth muscle cells	135 (1.3%)	147 (1.6%)
21	Red blood cell	151 (1.45%)	52 (0.57%)
22	neuroendocrine cell	173 (1.66%)	21 (0.23%)
23	Type 6 keratinocyte	123 (1.18%)	68 (0.74%)
24	unidentified	106 (1.02%)	83 (0.9%)
25	Type 7 keratinocyte	64 (0.62%)	108 (1.18%)
26	Type 2 Fibroblast	103 (0.99%)	65 (0.71%)
27	Microglial cell	95 (0.91%)	37 (0.4%)
28	Goblet cell	83 (0.8%)	34 (0.37%)
29	Brush cell	70 (0.67%)	27 (0.29%)
30	T cells	71 (0.68%)	21 (0.23%)
31	Melanocyte	42 (0.4%)	26 (0.28%)
32	Neurons cell	17 (0.16%)	23 (0.25%)
